# Supplementary material for: Haploinsufficiency of Hedgehog interacting protein causes increased emphysema induced by cigarette smoke through network rewiring
Source: PubMed Central journal article supplement (PMC4355149; doi:10.1186/s13073-015-0137-3), 2015-02-14
Supplement: 13073_2015_137_MOESM1_ESM.pdf [file 13073_2015_137_MOESM1_ESM.pdf]

Supplemental Figure 1: RT-PCR measurements of HHIP expression in murine lungs.

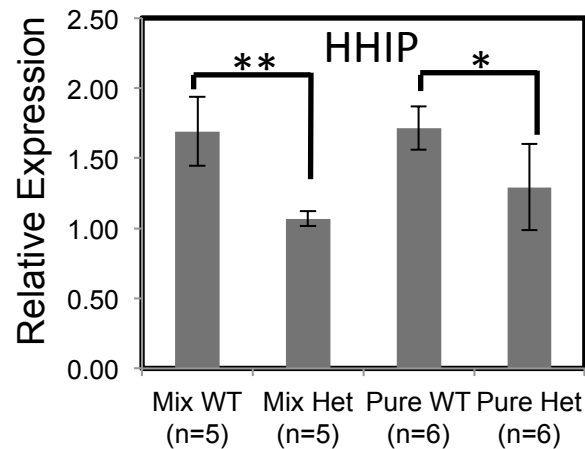

**Supplemental Figure 1.** Gene expression of *Hhip* in lung tissues from *Hhip*<sup>+/-</sup> mice in mixed and pure C57BL/6J backgrounds measured by real-time RT-PCR. GAPDH (glyceraldehyde 3-phosphate dehydrogenase) was used as a reference gene. \*, p<0.05 and \*\*, p<0.01. Means±SD are shown in each group.

Supplemental Figure 2. Gene expression of Hedgehog pathway components in murine lungs.

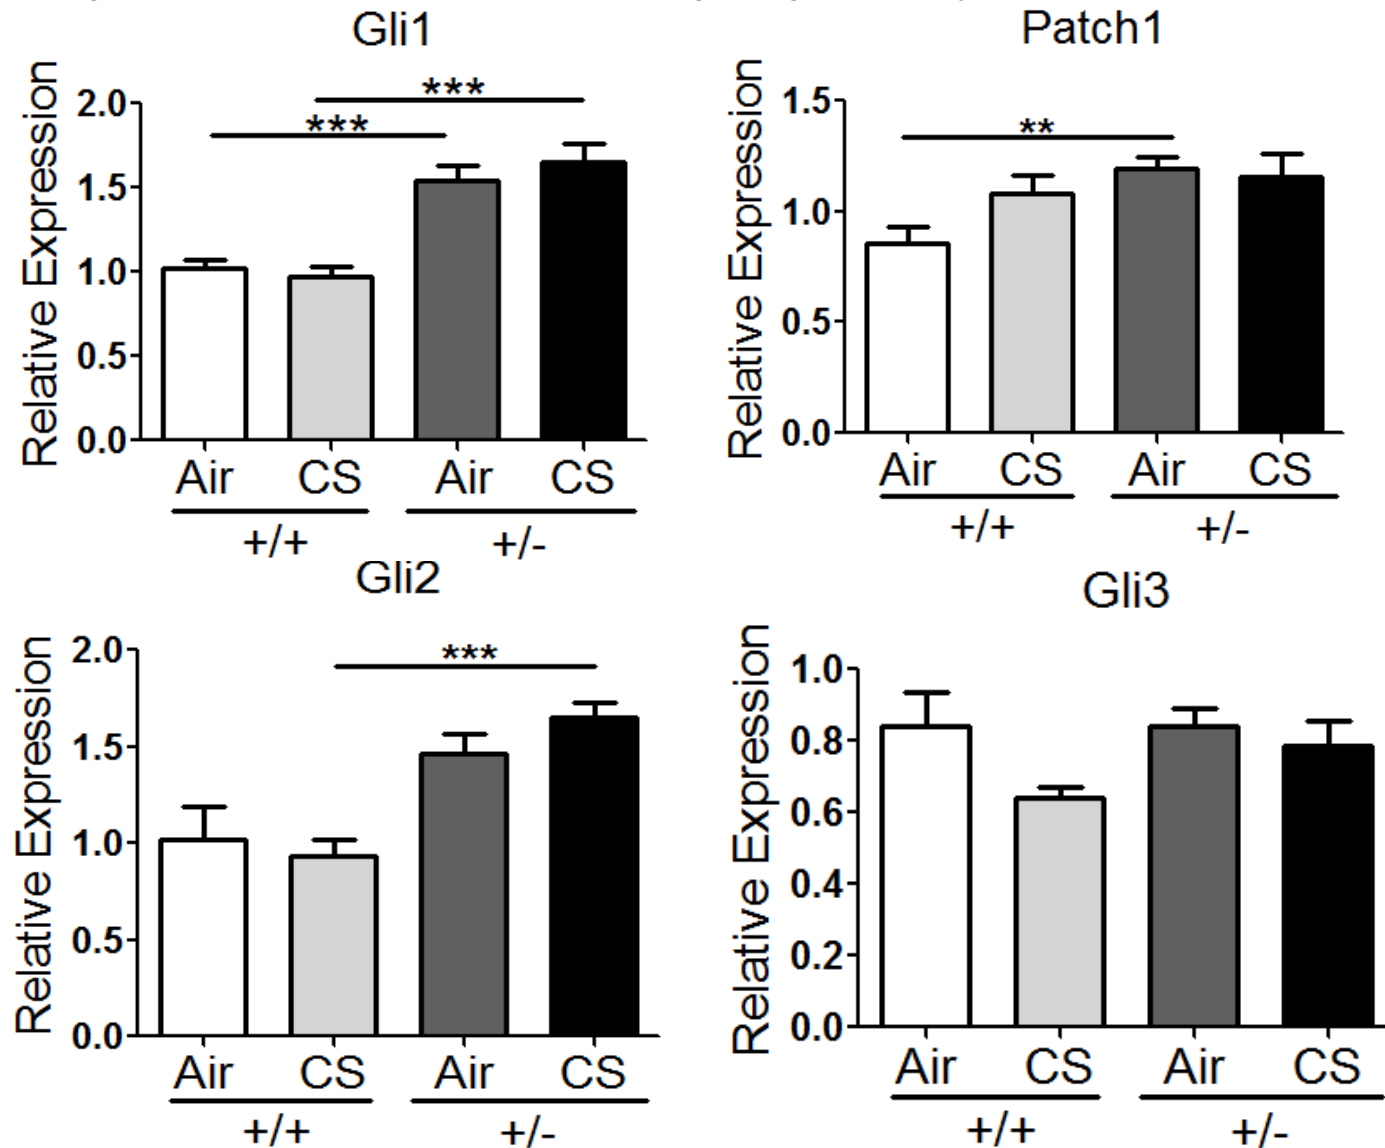

**Supplemental Figure 2.** Gene expression measurements of mouse *Gli1*, *Gli2*, *Gli3* and *Ptch1* in lung tissues from *Hhip*<sup>+/-</sup> (+/-) and *Hhip*<sup>+/+</sup> mice(+/+) exposed to air or CS for 6 months detected by real-time RT-PCR. GAPDH (Glyceraldehyde 3-phosphate dehydrogenase) was used as a reference gene. Means±SEM were from at least 6 mice in each group. \*\*\*, p<0.001; \*\*, p<0.01.

Supplemental Figure 3: Differential lung tissue gene expression related to *Hhip* genotype and cigarette smoke exposure based on microarray analysis using gene probesets.

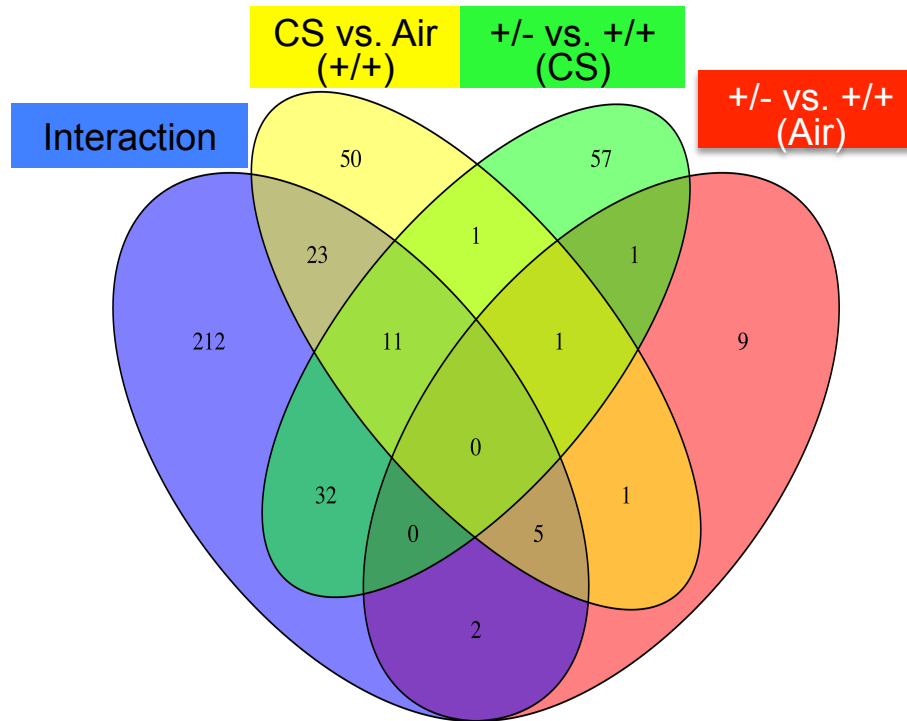

**Supplemental Figure 3.** Venn diagram shows comparisons of differentially expressed genes using probesets in *Hhip*<sup>+/-</sup>-CS vs. *Hhip*<sup>+/-</sup>-Air (yellow oval), *Hhip*<sup>+/-</sup>-CS vs. *Hhip*<sup>+/-</sup>-CS (green oval), *Hhip*<sup>+/-</sup>-Air vs. *Hhip*<sup>+/-</sup>-Air (red oval) and genes enriched based on interaction with smoke treatment (blue oval). +/+ : *Hhip*<sup>+/+</sup>; +/- : *Hhip*<sup>+/-</sup>; CS: cigarette smoke.

Supplemental Figure 4: Correlation of the number of lymphoid aggregates with airspace size in murine lungs.

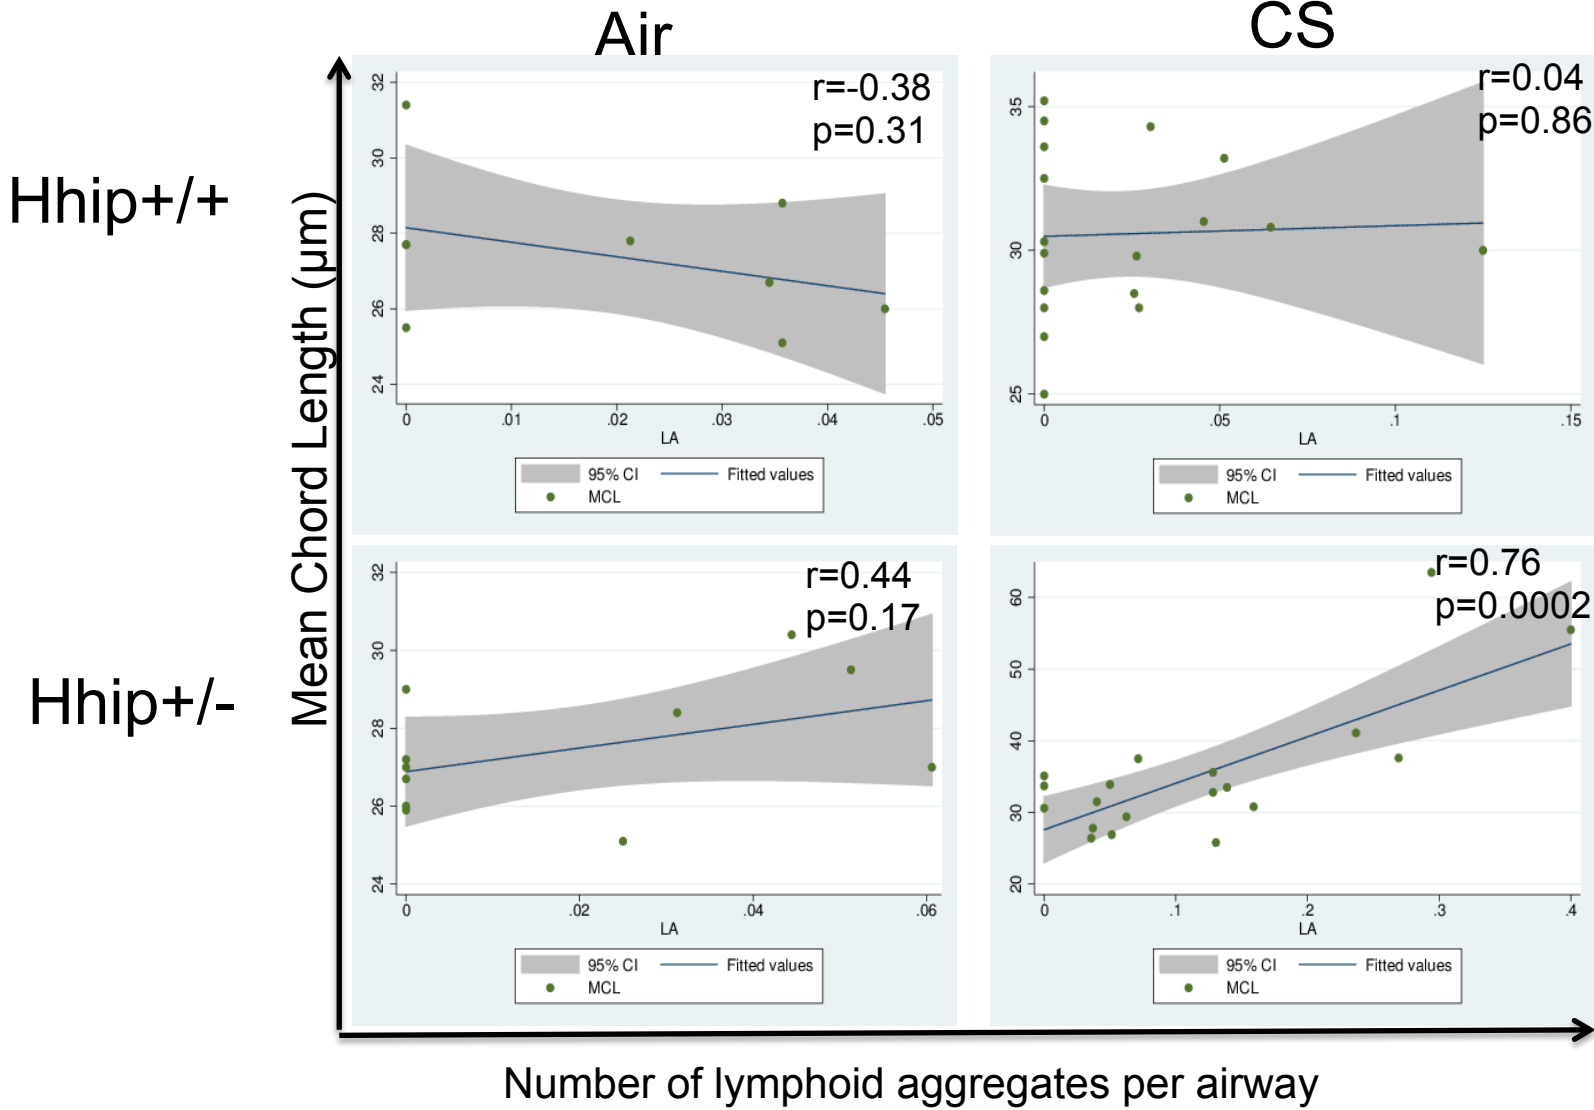

**Supplemental Figure 4.** Correlation of the number of lymphoid aggregates per airway (200-1000μm) with the airspace size (mean chord length, MCL) in *Hhip*<sup>+/+</sup> and *Hhip*<sup>+/-</sup> mice exposed to Air or cigarette smoke (CS) for 6 months. Pearson correlation coefficients (r) and statistical significance (p) of the correlation coefficient are shown in each graph. CS: cigarette smoke.

Supplemental Figure 5: Differential T cells signaling in murine lungs from *Hhip*<sup>+/-</sup> mice exposed to 6 months (A-C) or 2 months (D) of cigarette smoke compared with *Hhip*<sup>+/+</sup> mice.

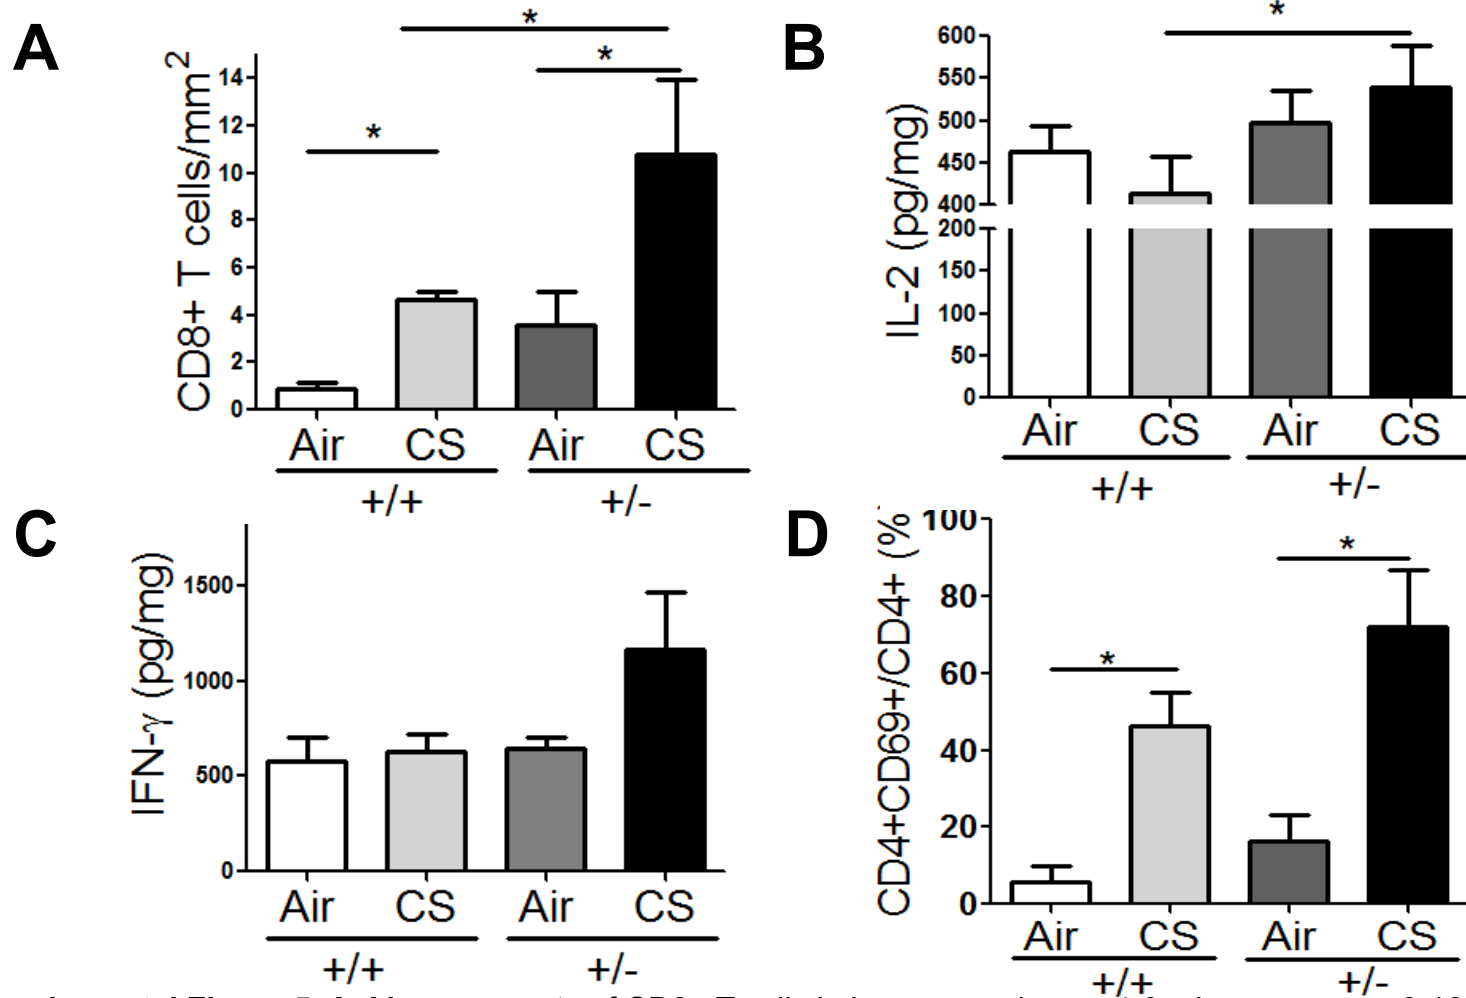

**Supplemental Figure 5. A.** Measurements of CD8+ T cells in lung parenchyma, 4-9 mice per group. 6-10 images/mouse were taken to quantify number of CD8+ T cells in the alveolar space. Results were expressed as the number of CD8+ T cells per alveolar space area. By Kruskal-Wallis test, we detected significant difference among groups ( $p < 0.001$ ). Results from Wilcoxon rank sum test for pair-wised comparisons are shown here. **B.** Measurements of IL-2 by ELISA in murine lungs from *Hhip*<sup>+/+</sup> and *Hhip*<sup>+/-</sup> mice exposed to 6 months of CS. Means $\pm$ SEM are from 8-11 mice per group. **C.** Measurements of IFN- $\gamma$  by ELISA in murine lungs from *Hhip*<sup>+/+</sup> and *Hhip*<sup>+/-</sup> mice exposed to 6 months of CS. Means $\pm$ SEM are from 7-10 mice per group. A trend toward significance between CS-exposed *Hhip*<sup>+/-</sup> vs. *Hhip*<sup>+/+</sup> mice was detected by unpaired t test. **D.** Percentage of the CD4+CD69+ T cells among total CD4+ T cells in murine lungs from *Hhip*<sup>+/-</sup> and *Hhip*<sup>+/+</sup> mice exposed to CS for 2 months detected by flow cytometry. Means $\pm$ SEM were from 3-6 mice per group. \*,  $p < 0.05$ , \*\*,  $p < 0.01$ . +/+ : *Hhip*<sup>+/+</sup>; +/- : *Hhip*<sup>+/-</sup>; CS: cigarette smoke.

Supplemental Figure 6. Transcription factors connected with HHIP in the subnetworks generated by PANDA analysis.

|            | Hhip+/- vs Hhip+/+ (Air) | CS vs Air (Hhip+/+) | Hhip+/- vs Hhip+/+ (CS) | CS vs Air (Hhip+/-) |
|------------|--------------------------|---------------------|-------------------------|---------------------|
| CREB1      | 0.445 (1.02e-07)         | 0.914 (2.97e-17)    | -0.568 (1.21e-06)       | -0.099 (3.29e-01)   |
| EGR1       | 2.300 (8.52e-04)         | 2.629 (1.42e-04)    | -0.140 (7.00e-01)       | 0.189 (6.32e-01)    |
| ESR1       | 0.636 (1.42e-04)         | 0.881 (7.93e-07)    | -0.335 (2.85e-03)       | -0.089 (4.19e-01)   |
| FOXI1      | -0.336 (1.63e-01)        | -1.212 (1.69e-05)   | 1.463 (2.59e-10)        | 0.587 (7.00e-04)    |
| FOXQ1      | -0.617 (3.13e-07)        | -1.220 (1.67e-18)   | 0.931 (3.27e-09)        | 0.328 (1.83e-02)    |
| KLF4       | 2.320 (1.36e-03)         | 2.676 (2.20e-04)    | -0.229 (5.67e-01)       | 0.127 (7.70e-01)    |
| MZF1 5-13  | 0.781 (6.69e-03)         | 0.756 (6.84e-03)    | 0.238 (9.55e-02)        | 0.212 (1.73e-01)    |
| NF-KAPPAB  | 0.554 (2.49e-09)         | 0.878 (6.48e-14)    | -0.516 (2.35e-10)       | -0.193 (1.36e-03)   |
| NKX3-2     | -0.177 (2.63e-01)        | 0.181 (2.44e-01)    | -0.359 (1.96e-04)       | -0.001 (9.88e-01)   |
| PLAG1      | 0.274 (3.63e-04)         | 0.777 (1.01e-13)    | -0.648 (8.86e-13)       | -0.145 (2.97e-02)   |
| REL        | 0.514 (9.33e-09)         | 0.745 (3.33e-13)    | -0.533 (1.03e-09)       | -0.303 (7.18e-05)   |
| RELA       | 0.388 (1.45e-10)         | 0.697 (1.14e-18)    | -0.555 (6.04e-15)       | -0.246 (3.39e-06)   |
| SP1        | 2.379 (3.12e-03)         | 2.537 (1.45e-03)    | 0.073 (8.66e-01)        | 0.230 (6.18e-01)    |
| TAL1::TCF3 | -0.236 (3.84e-03)        | -0.327 (2.55e-04)   | 0.178 (1.23e-02)        | 0.088 (1.74e-01)    |
| ATF1       | 0.095 (3.89e-01)         | 0.587 (9.47e-06)    | -0.569 (4.78e-07)       | -0.077 (3.84e-01)   |
| E2F2       | 1.045 (6.12e-09)         | 1.611 (2.10e-15)    | -0.880 (2.70e-06)       | -0.313 (7.26e-02)   |
| E2F3       | 0.992 (1.60e-09)         | 1.628 (1.14e-17)    | -0.996 (1.01e-07)       | -0.360 (3.14e-02)   |
| HMBOX1     | -0.442 (3.90e-03)        | -0.763 (5.46e-06)   | 0.245 (1.11e-02)        | -0.076 (4.38e-01)   |
| JUNDM2     | 0.056 (6.22e-01)         | 0.380 (2.26e-03)    | -0.361 (8.95e-05)       | -0.036 (6.39e-01)   |
| KLF7       | 2.259 (7.43e-04)         | 2.929 (2.07e-05)    | -0.594 (1.20e-01)       | 0.076 (8.53e-01)    |
| OSR1       | -0.306 (5.65e-04)        | -0.302 (3.16e-03)   | 0.012 (8.86e-01)        | 0.015 (8.03e-01)    |
| OSR2       | -0.258 (1.70e-02)        | -0.265 (3.07e-02)   | -0.121 (1.80e-01)       | -0.129 (6.59e-02)   |
| PLAGL1     | 0.993 (3.47e-07)         | 1.408 (1.74e-11)    | -0.527 (4.68e-04)       | -0.113 (4.65e-01)   |
| SMAD3      | 0.172 (1.70e-01)         | 0.104 (4.13e-01)    | 0.129 (6.83e-02)        | 0.061 (3.28e-01)    |
| SP4        | 2.213 (4.52e-04)         | 2.863 (9.90e-06)    | -0.697 (7.06e-02)       | -0.046 (9.10e-01)   |
| TCF2       | -0.235 (2.00e-01)        | -0.287 (1.09e-01)   | -0.235 (1.80e-02)       | -0.287 (1.08e-02)   |
| TCFAP2E    | 1.044 (6.15e-06)         | 1.348 (2.40e-08)    | -0.426 (3.90e-03)       | -0.122 (4.25e-01)   |
| ZBTB12     | -0.151 (3.03e-01)        | -0.108 (4.51e-01)   | -0.278 (5.63e-03)       | -0.234 (2.41e-02)   |
| ZBTB3      | 0.326 (2.25e-03)         | 0.421 (1.49e-04)    | -0.007 (9.06e-01)       | 0.089 (1.28e-01)    |
| ZFP161     | 1.293 (2.34e-06)         | 1.939 (5.56e-11)    | -0.961 (6.76e-05)       | -0.316 (1.87e-01)   |
| ZFP281     | 1.461 (5.37e-03)         | 1.385 (6.77e-03)    | 0.352 (1.85e-01)        | 0.276 (3.29e-01)    |
| ZFP740     | 0.969 (1.26e-02)         | 1.011 (7.92e-03)    | 0.263 (1.92e-01)        | 0.305 (1.65e-01)    |

# Supplemental Figure 7 Expression of *Klf4* in *Hhip*<sup>+/-</sup> murine lungs revealed by microarray and RT-PCR.

**A**

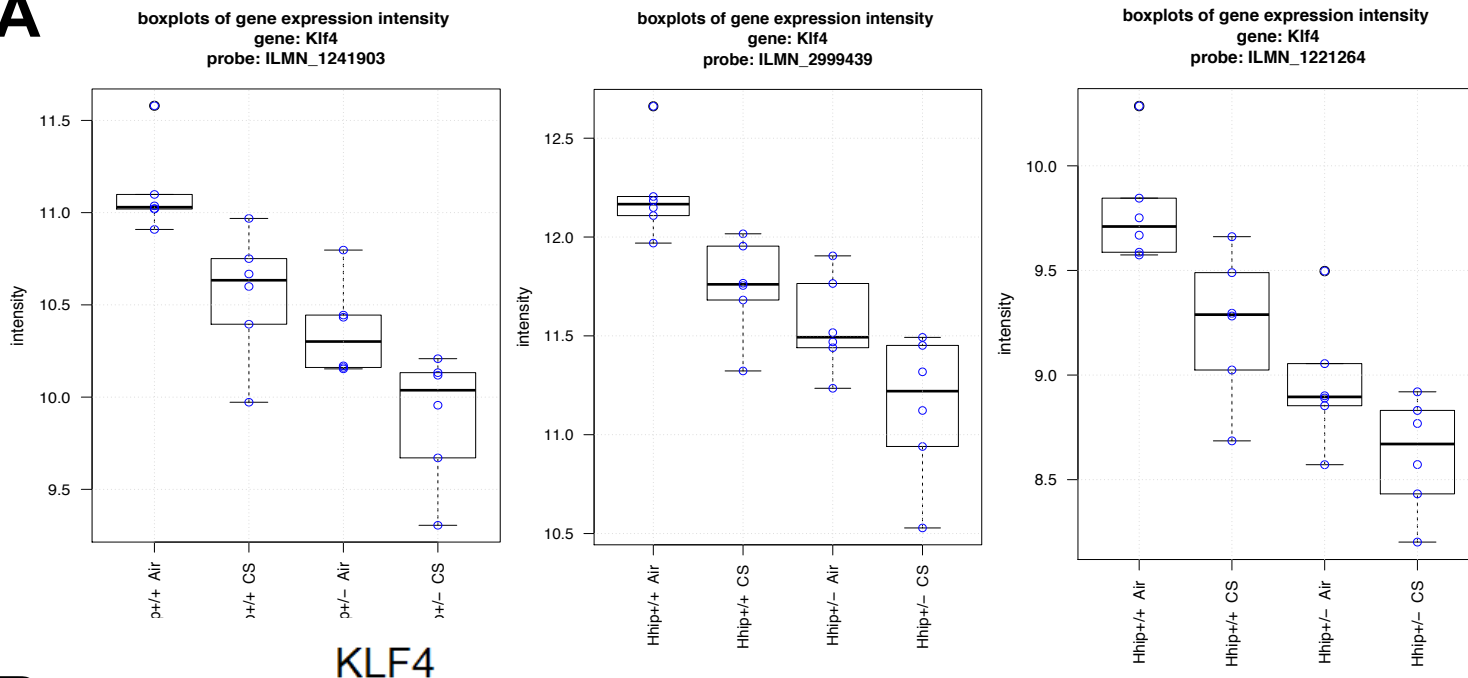

**B**

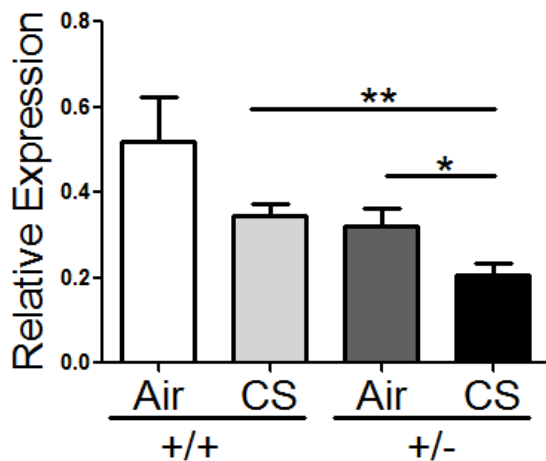

**Supplemental Figure 7.** Expression of *Klf4* in murine lungs from four groups of mice (N=6/group). A. Box plots for three probe sets targeting murine *Klf4* gene as revealed in microarray analysis and real-time RT-PCR (B) in murine lungs exposed to 6 months of cigarette smoke. Means±SEM are from 6 mice/group. Two-way ANOVA analysis showed significant difference between two genotypes and between air and CS treatment. (p<0.01). \*\*, p<0.01. +/+ : *Hhip*<sup>+/+</sup>; +/- : *Hhip*<sup>+/-</sup>; CS: cigarette smoke.
